# Supplementary material for: CircCEMIP promotes anoikis-resistance by enhancing protective autophagy in prostate cancer cells
Source: Springer Nature journal article supplement (doi:10.1186/s13046-022-02381-7), 2022-06-02
Supplement: MOESM1 [file 23121586]

# Supplementary Figure 1

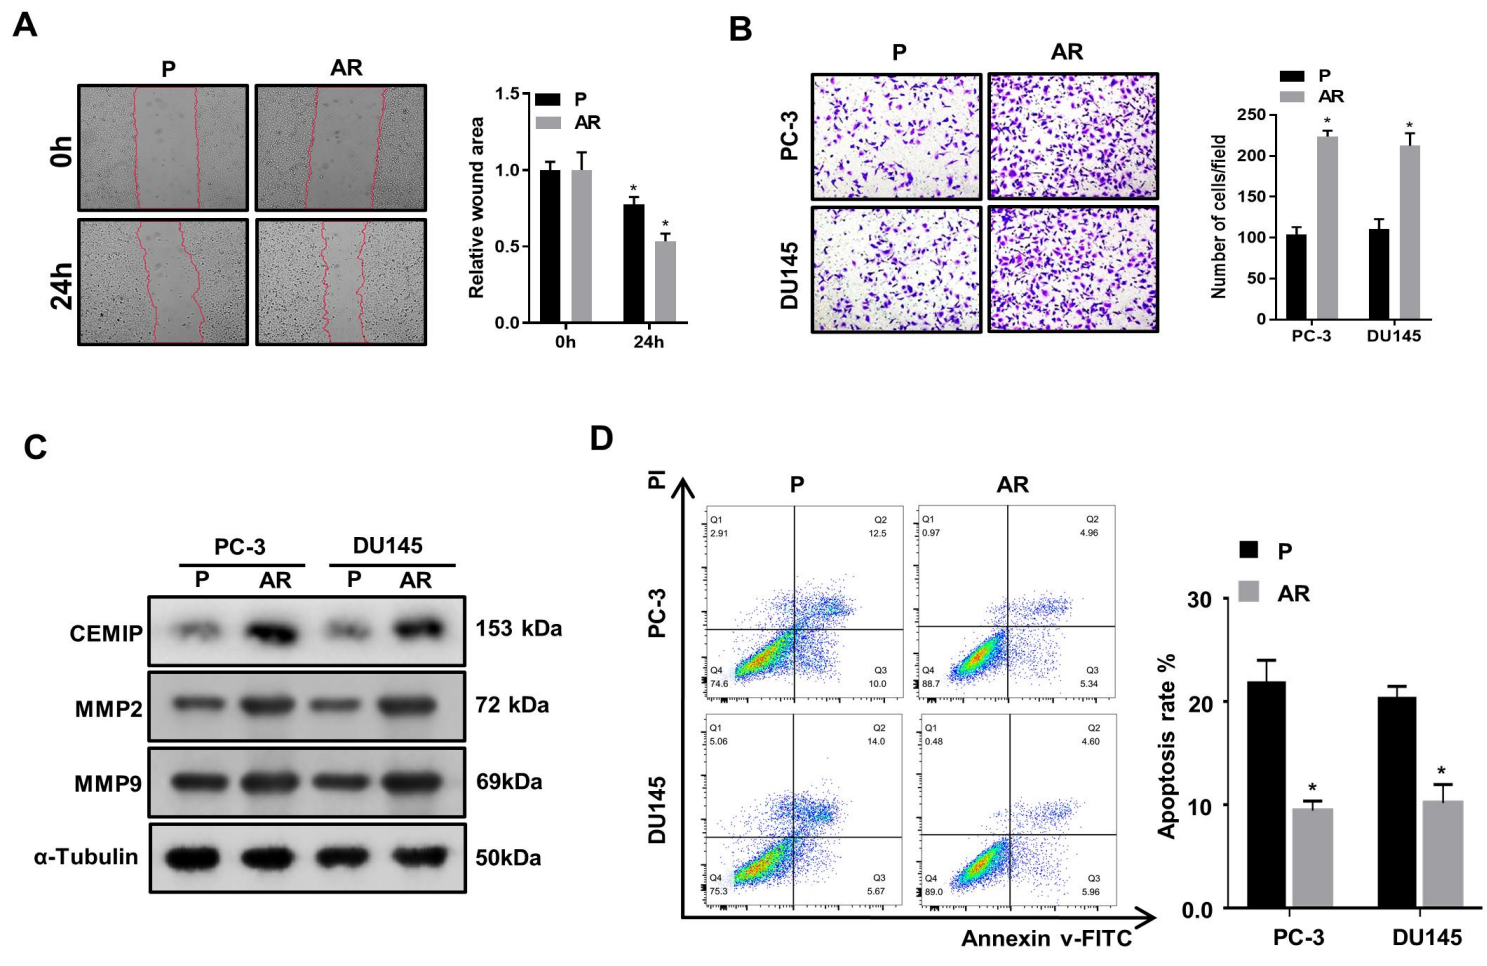

# Supplementary Figure 2

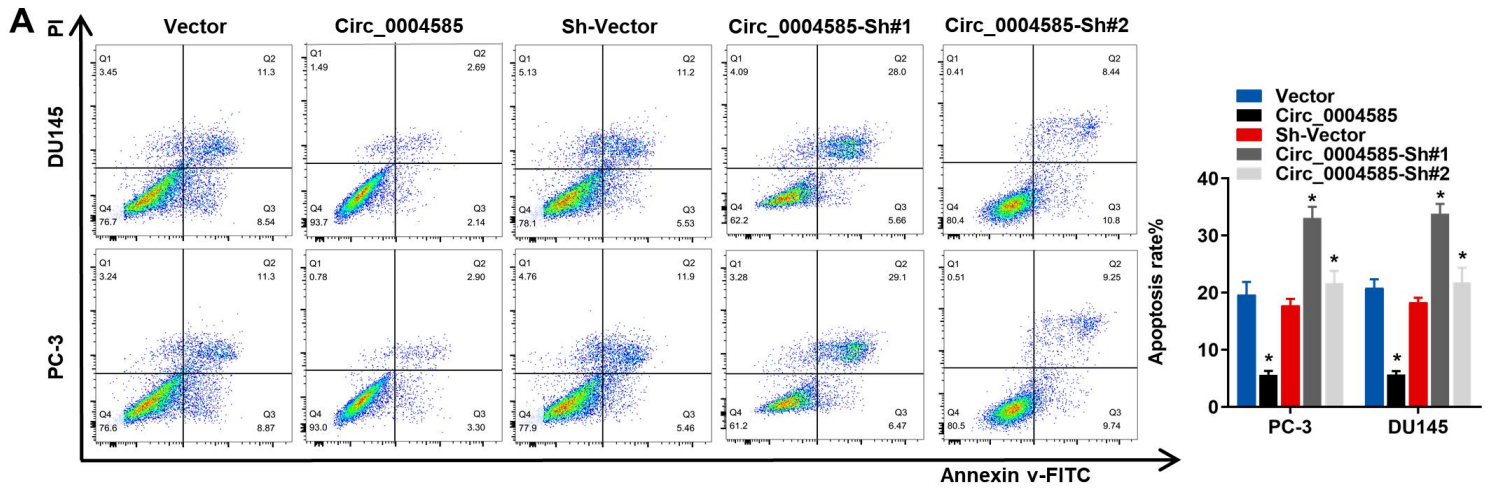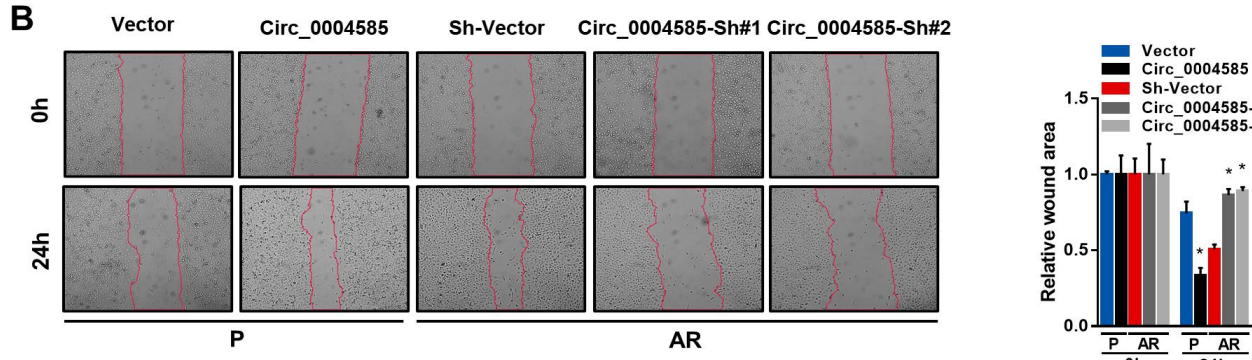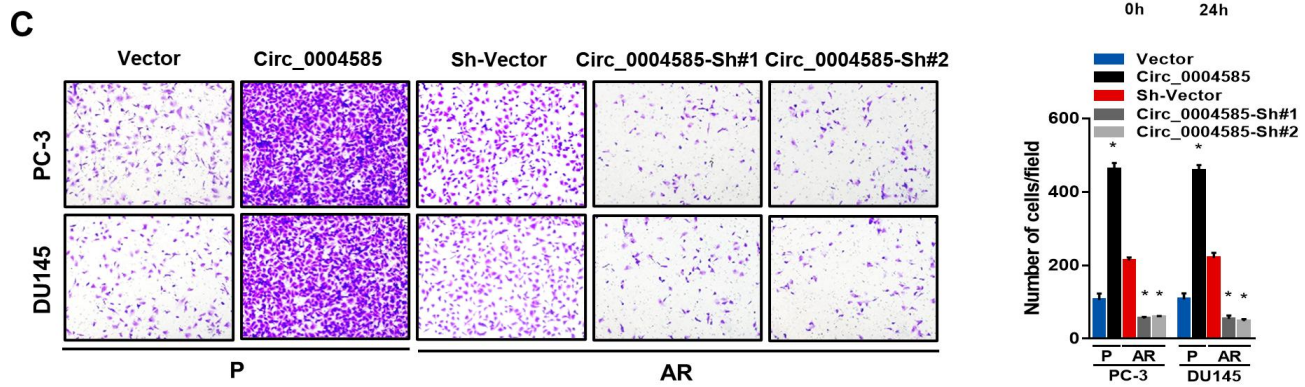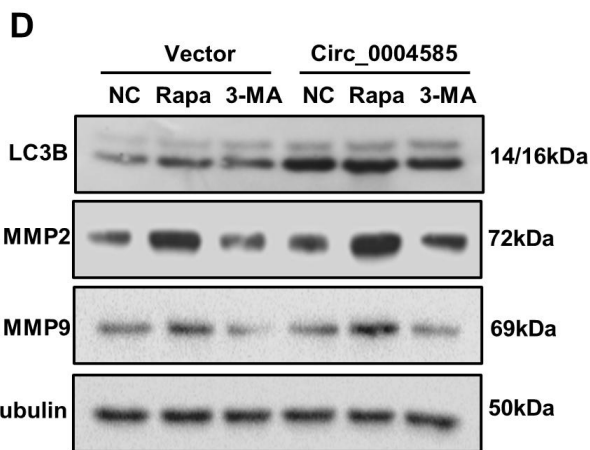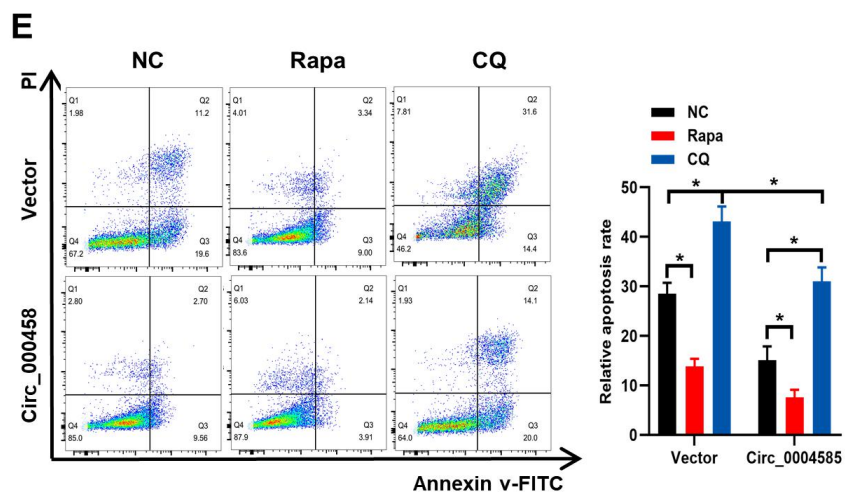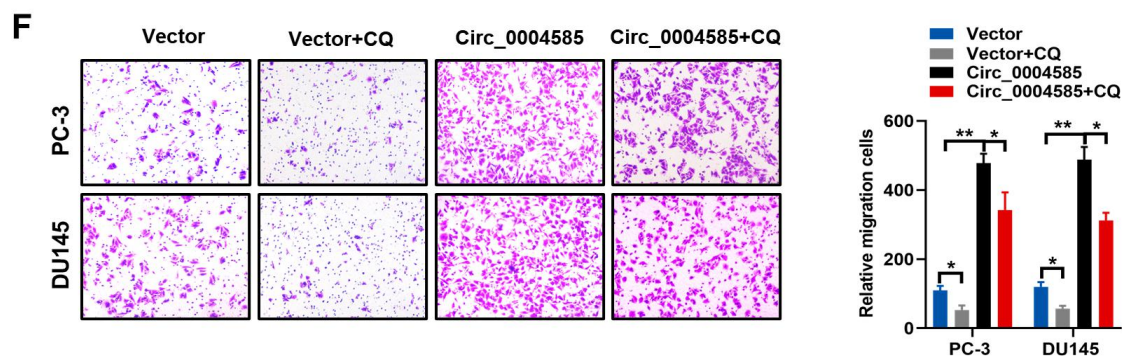

# Supplementary Figure 3

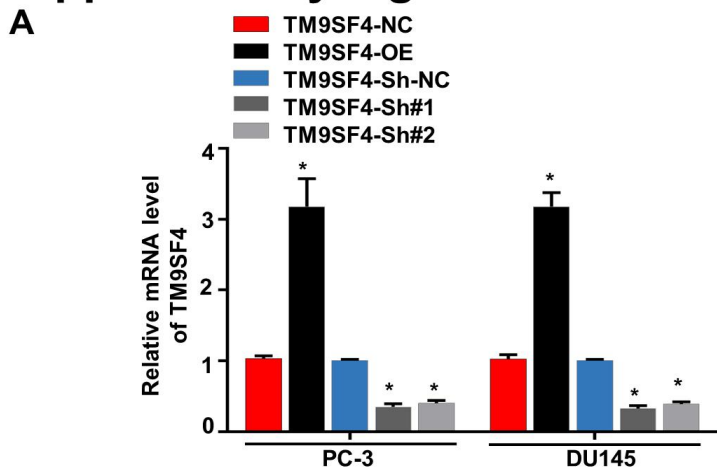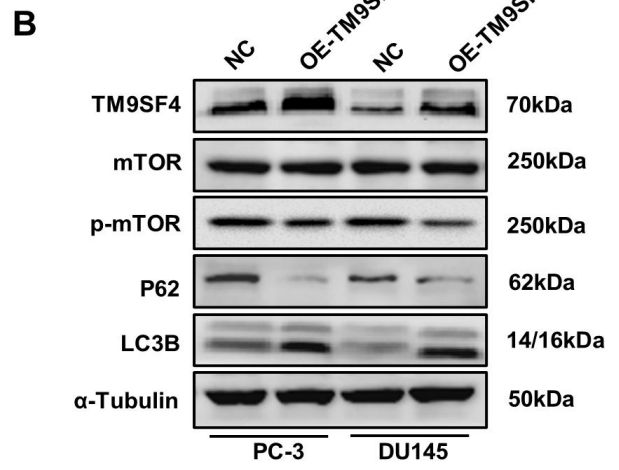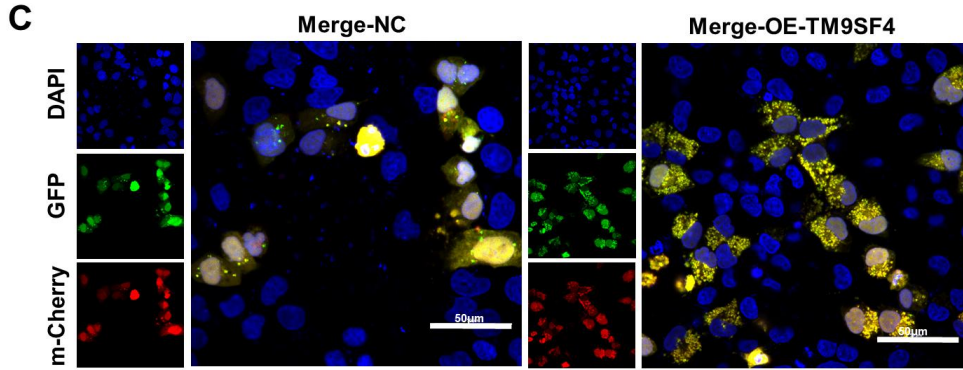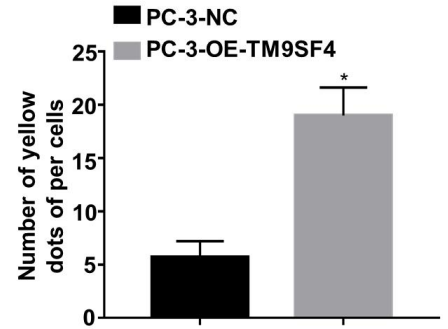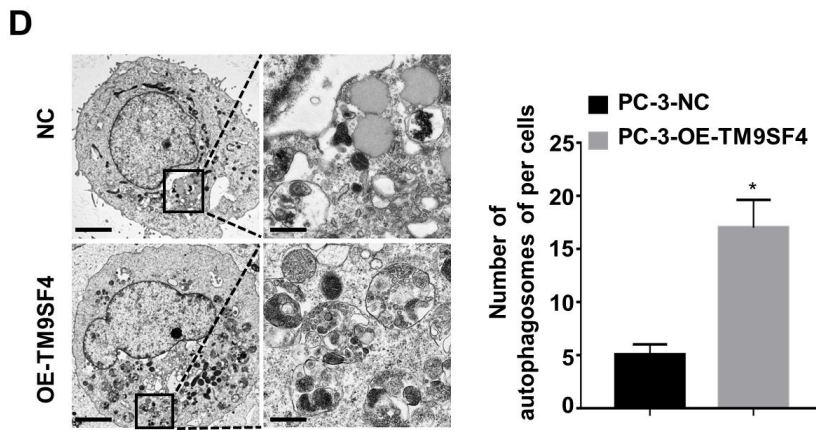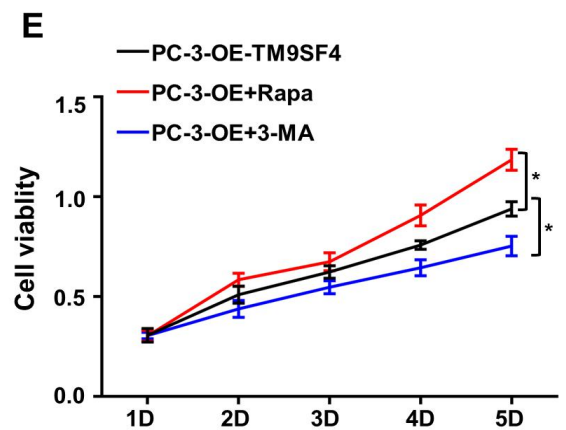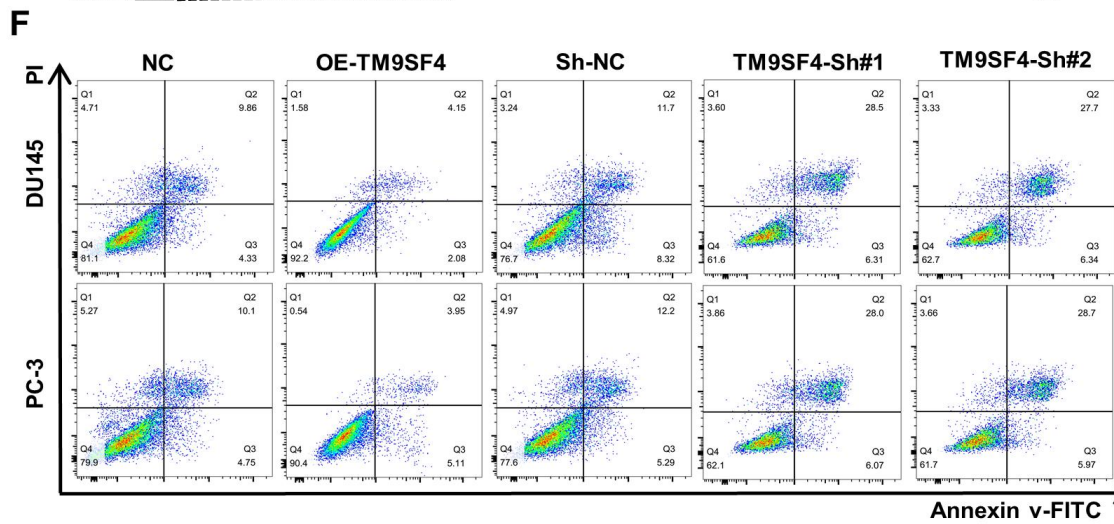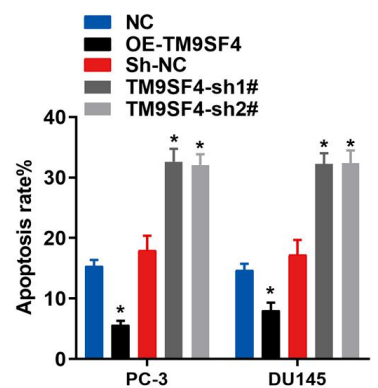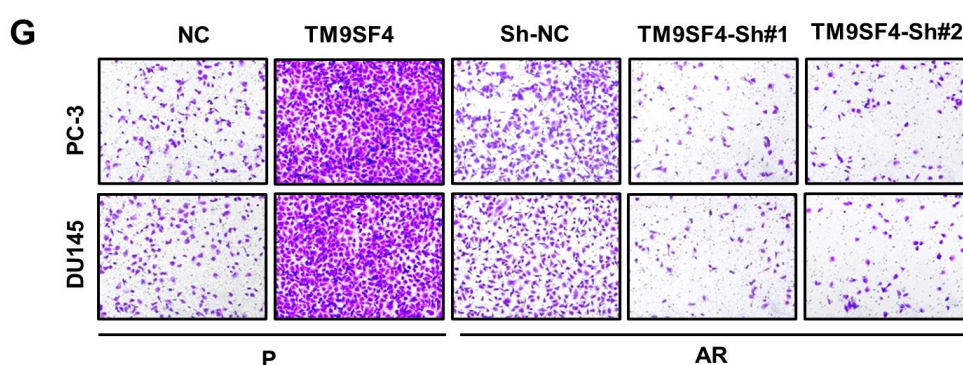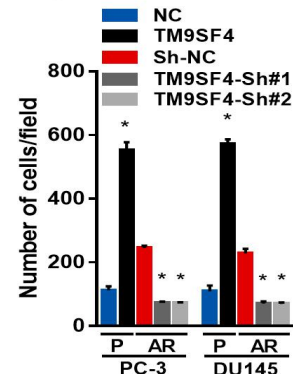

**Supplementary Figure 1: Anoikis-resistant PCa cells enhance the capabilities of survival and migration.**

(A) Representative pictures (left panel) and percentage of the original wound area (right panel) of parental (P) and anoikis-resistant (AR) PCa cells (PC-3, DU145) analyzed using a wound-healing assay (Scale bar, 100  $\mu$ m).

(B) Representative pictures (left panel) and quantification (right panel) of migratory parental (P) and anoikis-resistant (AR) PCa cells (PC-3, DU145) analyzed using a transwell migration assay (Scale bar, 100  $\mu$ m).

(C) The protein levels of CEMIP, MMP2, and MMP9 detected by western-blotting in anoikis-resistant (P) and parental (AR) PCa cells.

(D) Apoptosis was assessed by flow cytometry assay in anoikis-resistant and parental PCa cells. Bar graphs show the statistical analysis of three independent experiments (\*  $P < 0.05$ ).

**Supplementary Figure 2: Circ\_0004585 promotes PCa cells migration, invasion, anoikis-resistance.**

(A) Representative images (left panel) and quantification (right panel) results of flow cytometry assay for the apoptosis rates of PC-3 and DU145 cells upon circ\_0004585 overexpression or knockdown.

(B) Representative pictures and percentage of the original wound area of PC-3 cells with circ\_0004585 overexpression or knockdown analyzed using a wound-healing assay (Scale bar, 100  $\mu$ m).

(C) Representative images results of transwell migration assays for PC-3 and DU145 cells with circ\_0004585 overexpression or knockdown (Scale bar, 100  $\mu$ m). Bar graphs show the statistical analysis of three independent experiments (\*  $P < 0.05$ ).

(D) Western blot was performed to evaluate the expression of LC3II/I, MMP2 and MMP9 in overexpressed circ\_0004585 PC-3 cells with autophagy activator rapamycin or autophagy inhibitor 3-MA for 24 h.

(E) Flow cytometry was used to detect the apoptosis level of PCa cells with stable overexpression of circ\_0004585 after the addition of rapamycin or CQ for 24 h, \*  $P < 0.05$ ; \*\*  $P < 0.01$ .

(F) Transwell assay was used to detect the migration cells of PCa cells with stable overexpression of circ\_0004585 after the addition of CQ for 24 h, (\*  $P < 0.05$ ; \*\*  $P < 0.01$ ).

**Supplementary Figure 3: Upregulation of TM9SF4 promotes the invasion, migration and anoikis-resistance of prostate cancer cells by activating autophagy**

(A) qRT-PCR was performed to evaluate the expression of TM9SF4 in PC-3 and DU145 cells which were transfected with the indicated plasmids. GAPDH was used as internal control.

(B) Western blot was performed to evaluate the expression of TM9SF4, mTOR, p-mTOR, P62, and LC3BII/I in PC-3 and DU145 cells which were transfected with the indicated plasmids.

(C) Autophagic flux was monitored in stable up-regulated TM9SF4 PC-3 cells expressing endogenous LC3B tagged with tandem fluorescent-mCherry-GFP as a reporter, GFP and mCherry signal colocalization (yellow dots) indicated the lack of phagophore or autophagosome fusion with lysosomes (Scale bar, 50  $\mu\text{m}$ ).

(D) Transmission electron microscopy (TEM) revealed the number of double-membrane autophagosomes in stable overexpressed TM9SF4 PC-3 cells (Original

magnification,  $\times 1000$ ,  $\times 1600$ , respectively).

(E) The cell viability rate was detected using CCK-8 after individually adding rapa or 3-MA to the PCa cells 24 h displaying stable TM9SF4 overexpression.

(F) Representative images results of flow cytometry assay for the apoptosis rates of PC-3 and DU145 cells upon TM9SF4 overexpression or knockdown.

(G) Representative pictures of PC-3 cells with circ\_0004585 overexpression or knockdown analyzed using a transwell migration assay (Scale bar, 100  $\mu\text{m}$ ). The results were derived from three independent experiments. Data are presented as the means  $\pm$  SEM of three independent experiments. \* $P < 0.05$ ; \*\* $P < 0.01$  (Student's t-test).

**Supplementary Table 1: qRT-PCR primer sequences in this study**

| Primer names       | Primer sequence         |
|--------------------|-------------------------|
| GAPDH-F            | GGTCGGAGTCAACGGATTTG    |
| GAPDH-R            | GGAAGATGGTGATGGGATTTC   |
| Circ_0004585-Con-F | AAGGAGGCGCTCTTGAGTTG    |
| Circ_0004585-Con-R | ACTGTGCCTGATTTGGGGTC    |
| Circ_0004585-Di-F  | TGGCCTCCTTGCAAGTCTG     |
| Circ_0004585-Di-R  | GGGAAGCAGGTCAGAGTGAG    |
| Circ_0002970-F     | TACCCGATTCACTTCCACCTG   |
| Circ_0002970-R     | TAGCATTTGTCCTCCATCTCCC  |
| Circ_0003893-F     | AGCCACTACTACTGGGACGA    |
| Circ_0003893-R     | GTAATGGGTGCTCCTGGTGA    |
| MiR-1248-F         | GCGACCTTCTTGATAAGCACTGT |
| MiR-1248-R         | AGTGCAGGGTCCGAGGTATT    |
| MiR-1231-F         | GCGGTGTCTGGGCGGAC       |
| MiR-1231-R         | AGTGCAGGGTCCGAGGTATT    |
| MiR-338-3p-F       | CGCGTCCAGCATCAGTGATT    |
| MiR-338-3p-R       | AGTGCAGGGTCCGAGGTATT    |
| MiR-657-F          | CGGGCAGGTTCTCACCCCTC    |
| MiR-657-R          | AGTGCAGGGTCCGAGGTATT    |

|              |                       |
|--------------|-----------------------|
| MiR-1265-F   | GCGCAGGATGTGGTCAAGT   |
| MiR-1265-R   | AGTGCAGGGTCCGAGGTATT  |
| MiR-661-F    | TGCCTGGGTCTCTGGCCT    |
| MiR-661-R    | AGTGCAGGGTCCGAGGTATT  |
| MiR-339-3p-F | TGAGCGCCTCGACGACA     |
| MiR-339-3p-R | AGTGCAGGGTCCGAGGTATT  |
| MiR-1182-F   | GGAGGGTCTTGGGAGGGA    |
| MiR-1182-R   | AGTGCAGGGTCCGAGGTATT  |
| MiR-663b-F   | GGTGGCCCGGCCGTGC      |
| MiR-663b-R   | AGTGCAGGGTCCGAGGTATT  |
| MiR-648-F    | CGCGAAGTGTGCAGGGC     |
| MiR-648-R    | AGTGCAGGGTCCGAGGTATT  |
| MiR-615-5p-F | GGGGGTCCCCGGTGCT      |
| MiR-615-5p-R | AGTGCAGGGTCCGAGGTATT  |
| MiR-1289-F   | GCGTGGAGTCCAGGAATCTG  |
| MiR-1289-R   | AGTGCAGGGTCCGAGGTATT  |
| TM9SF4-F     | GATTGGTTGCCGTGGTCTTTA |
| TM9SF4-R     | TTCTACGGGATCGTTCTGGTG |
| CEMIP-F      | GGCCGGTGATGTAGACGAAA  |
| CEMIP-R      | CCATTGGAGCCATGGACTGT  |

---



**Supplementary Table 2: Drugs and reagents**

| Drug / Reagent                   | Source             | Identifier / formulation |
|----------------------------------|--------------------|--------------------------|
| FITC-Annexin V apoptosis         | BD Biosciences kit | Catalog No: 556547       |
| PE-Annexin V apoptosis detection | BD Biosciences kit | Catalog No: 559763       |
| CCK-8                            | Vazyme Biotech     | Catalog No: A311-01      |
| rapamycin                        | Selleck            | Catalog No: S1039        |
| 3-Methyladenine                  | Selleck            | Catalog No: S2767        |

**Supplementary Table 3: Primary and secondary antibodies**

| Antibody                   | Source      | Identifier             | Host   |
|----------------------------|-------------|------------------------|--------|
| CEMIP antibody             | Abcam       | Catalog No: ab62322    | Rabbit |
| TM9SF4 antibody            | Proteintech | Catalog No: 25595-1-AP | Rabbit |
| mTOR antibody              | Proteintech | Catalog No: 66888-1-Ig | Rabbit |
| p-mTOR antibody            | CST         | Catalog No: 5536S      | Mouse  |
| S6K1 antibody              | Proteintech | Catalog No: 14485-1-AP | Rabbit |
| p-S6K1 antibody            | CST         | Catalog No: 9204S      | Rabbit |
| 4E-BP1 antibody            | CST         | Catalog No: 9644S      | Rabbit |
| p-4E-BP1 antibody          | CST         | Catalog No: 2855S      | Rabbit |
| P62 antibody               | Proteintech | Catalog No: 18420-1-AP | Rabbit |
| LC3B antibody              | Abcam       | Catalog No: ab192890   | Rabbit |
| $\alpha$ -Tubulin antibody | Proteintech | Catalog No: 66031-1-Ig | Mouse  |

|                           |             |                       |        |
|---------------------------|-------------|-----------------------|--------|
| 488 - Anti-Mouse IgG(H+L) | Proteintech | Catalog No: SA00013-1 | Mouse  |
| 594 –Anti-Rabbit IgG(H+L) | Proteintech | Catalog No: SA00013-4 | Rabbit |

---

**Supplementary Table 4: Probe sequence in this study**

| Probe name   | probe sequence                               |
|--------------|----------------------------------------------|
| Circ_0004585 | 5' TCCTGGCAGTGTGCTCCTTGCAGTCTTGCCTGGG-biotin |
| oligo probe  | 5' CCCAGGCAAGACTGCAAGGAGCACACTGCCAGGA-biotin |

---

**Supplementary Table 5: TM9SF4 shRNA sequence in this study**

| TM9SF4 | shRNA sequence              |
|--------|-----------------------------|
| ShRNA1 | 5'-GCGGATCACAGAAGACTACTA-3' |
| ShRNA2 | 5'-CGGTGGTACATGAACCGATT-3'. |

---
